# Supplementary material for: Das Konstrukt der „vollständigen Tätigkeit“ als Ziel guter Arbeitsgestaltung
Source: Atypon-hosted journal article supplement (doi:10.1026/0932-4089/a000420), 2023-10-12
Supplement: 0932-4089_a000420_esm1.pdf [file 0932-4089_a000420_esm1.pdf]

## ESM 1. Handlungsregulationstheorie

*Handlungsregulationstheorie* (HRT). Die Handlungsregulationstheorie (Hacker, 1973; Volpert, 1974) befasst sich mit der psychischen Regulation von Tätigkeiten insbesondere im Kontext der Erwerbsarbeit (Hacker & Sachse, 2014). Tätigkeiten sind „Vorgänge, mit denen Menschen Aufträge erfüllen“ (Hacker & Sachse, 2014, S. 35). Sie sind folglich bewusste, zielgerichtete Verwirklichungen eines vorweggenommenen Zieles, die ein Arbeitsergebnis zur Folge haben (Frese & Zapf, 1994; Hacker & Sachse, 2014; Oesterreich, Leitner & Resch, 2000). Dabei wird die Antriebs- und Ausführungsregulation unterschieden. Die Antriebsregulation umfasst die willentliche Ausrichtung auf ein Ziel und bei der Zielumsetzung das Abschirmen vor anderen Zielen und das Dranbleiben. Sie stellt somit einen motivationalen Aspekt dar. Die Ausführungsregulation betrifft hingegen den operationalen Aspekt mit der Verwirklichung der Tätigkeit durch die Handlungsvorbereitung, Führung und Kontrolle der Zielerreichung (Hacker & Sachse, 2014). Um dies zu verdeutlichen werden nachfolgend wichtige Begriffe der HRT eingeführt.

*Tätigkeit, Handlung und Operation*. Die Verwirklichung der Tätigkeit erfolgt durch zielgerichtete Handlungen, welche „die kleinste willensmäßig gesteuerte Einheit“ (Hacker & Sachse, 2014, S. 44) darstellen. Beispielsweise hat ein Arbeitender in einer nicht automatisierten Poststelle eines Unternehmens den Auftrag, die Post abzufertigen. Die Postabfertigung stellt folglich die Tätigkeit dar. Diese Tätigkeit wird durch die Handlungen Postabholung, Postöffnung, Postsortierung und Postverteilung verwirklicht. Eine Handlung wird wiederum durch nicht bewusst als Ziel antizipierte Operationen und Bewegungen durchgeführt (Hacker & Sachse, 2014). So erfordert die Handlung Postabholung die folgenden Operationen: zu dem Postfach gehen; in das Postfach greifen und die Post herausholen; die Post zurück an den Platz bringen.

*Operative Abbildsysteme*. Die Voraussetzung zur Verwirklichung von Tätigkeiten bildet das Ziel. Nach Hacker und Sachse (2014) geschieht dies über operative Abbildsysteme, die relativ beständige tätigkeitsregulierende Repräsentationen der zu erreichenden (Unter-)Ziele, des durchzuführenden Aktionsprogramms und eventuell der zu berücksichtigenden Bedingungen darstellen. Sie enthalten somit den antizipierten Ausgangs- und Sollzustand sowie die antizipierten Prädiktionen von Maßnahmen für die Transformation des Ausgangs- in den Sollzustand. Während der Handlungsausführung kommt es zu ständigen Rückkopplungen in Form eines Soll-Ist-Vergleichs. Je schlechter der Sollzustand ausgebildet ist, umso beanspruchender, fehleranfälliger und zeitaufwendiger ist dieser Vergleich bei der

Tätigkeitsverwirklichung (Frese & Zapf, 1994; Hacker & Sachse, 2014). Folglich gilt: Je adäquater ein mentales operatives Abbildsystem ist, umso effektiver ist die Tätigkeit und umso besser ist die Güte der problemlösenden Prozesse.

*Vor(weg)nahme-Veränderungs-Rückkopplungseinheiten.* Der Rückkopplungsprozess mit dem operativen Abbildsystem als Vergleichskomponente erfolgt durch Vor(weg)nahme-Veränderungs-Rückkopplungseinheiten (VVR-Einheiten). Diese sind hierarchisch-sequenziell organisiert (Frese & Zapf, 1994; Hacker & Sachse, 2014). Das bedeutet, dass die aus dem Arbeitsauftrag redefinierte Aufgabe (vgl. Hackman, 1969) die Entwicklung eines antizipierten Zieles zur Folge hat, welches in Unterziele unterteilt wird. Je komplexer, komplizierter und neuartiger die übernommene Aufgabe ist, umso mehr Unterziele können sich ergeben. Für jedes dieser (Unter-)Ziele resultieren VVR-Einheiten. Entsprechend der (Unter-)Ziele werden zyklisch Soll-Ist-Vergleiche durchgeführt. Ist eine Diskrepanz vorhanden, wird ein Resultat vorweggenommen und eine Vornahme abgeleitet, welche eine „Veränderung der dinglichen und sozialen Umwelt leitet“ (Hacker & Sachse, 2014, S. 153). Die Maßnahmen der Veränderung können je nach Zielebene Tätigkeiten, Handlungen oder Operationen sein. Nach der Veränderung erfolgt eine Rückkopplung mit dem antizipierten (Unter-)Ziel. Wenn eine ausreichende Übereinstimmung mit dem (Unter-)Ziel erreicht ist, werden weitere bisher zurückgestellte (Unter-)Ziele verfolgt (Frese & Zapf, 1994; Hacker & Sachse, 2014). In Abbildung 1 sind die Inhalte operativer Abbildsysteme sowie eine vereinfachte hierarchisch-sequenzielle Struktur von VVR-Einheiten bei der Tätigkeitsverwirklichung dargestellt. Zusätzlich soll in der Darstellung die Unterteilung von Tätigkeit, Handlung und Operation verdeutlicht werden. Eine feingliedrigere Unterteilung in Bewegungen und Muskelkontraktionen ist für die psychologischen Zusammenhänge nicht sinnstiftend (Hacker & Sachse, 2014).

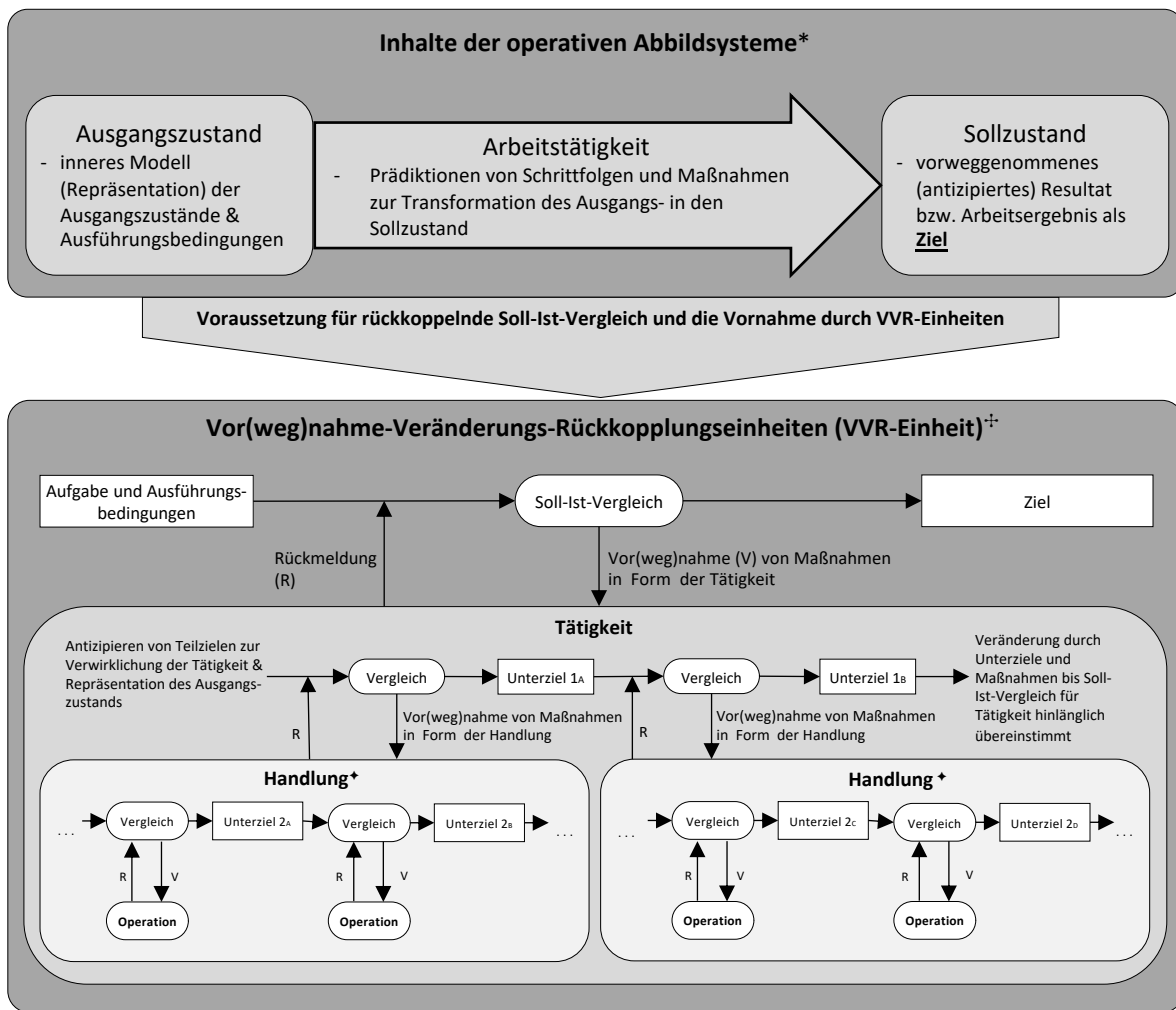

Abbildung 1. Vereinfachte Darstellung der Inhalte von operativen Abbildsystemen und der Vor(weg)nahme-Veränderungs-Rückkopplungseinheiten mit Integration der Tätigkeit, Handlung und Operation (eigene Darstellung nach Hacker & Sachse, 2014)

\*Für rückkoppelnde Soll-Ist-Vergleiche und die Vornahme sind alle Abschnitte der Tätigkeit von den operativen Abbildsystemen abhängig.

±Hier ist eine hierarchisch-sequenzielle Struktur einer Funktionseinheit zur Verwirklichung der Arbeitstätigkeit dargestellt. Die Veränderung ist je nach Ebene durch Tätigkeit, Handlung und Operation ersetzt. Die Darstellung muss im Sinne eines Flussdiagramms verstanden werden, wobei durch ständige Vornahmen und Rückmeldungen zwischen unter- und übergeordneten Ebenen gewechselt wird (Hacker & Sachse, 2014). Je nach Komplexität der Arbeitstätigkeit kann die Struktur noch verschachtelter sein und es können zusätzliche Ebenen wie Teiltätigkeit oder Teilhandlung hinzugefügt werden. Zur Vereinfachung wurden die VVR-Einheiten als geschlossener Kreis dargestellt. Laut Hacker und Sachse (2014) ist dieser jedoch offen für Rückwirkungen aus der Umwelt und für Führungsvorgaben.

◆Für Handlungen können sich als kleinste willensmäßig gesteuerte Einheit noch Unterziele antizipieren lassen. Die VVR-Einheiten können aber je nach Bewusstseinspflichtigkeit der Handlung auch durch einfache Vornahmen verbunden sein.

Die wesentlichen Hintergründe zum Verständnis der psychischen Regulation von Tätigkeiten sind somit erläutert und die bereits eingeführten Begriffe der Antriebs- und Ausführungsregulation können spezifiziert werden. Die Antriebsregulation reguliert die bewusste willentliche Ausrichtung auf das Ziel bis zum Entschluss zur Verwirklichung der Tätigkeit. Sie bestimmt somit ob und wie intensiv die Verwirklichung stattfindet. Das Ergebnismodell im operativen Abbildsystem entsteht bereits antriebsregulatorisch während der Vorbereitung der Tätigkeit und muss während der Verwirklichung aufrechterhalten werden. Die Ausführungsregulation ist hingegen für die Art und Weise der Verwirklichung und die Aufstellung eines Vorgehensmodells im operativen Abbildsystem entscheidend. Durch sie werden die Maßnahmen der Verwirklichung bestimmt, kontrolliert und angepasst (Hacker & Sachse, 2014).

*Hierarchische Vollständigkeit.* Je nach Kompliziertheit, Komplexität und Neuheit der Anforderungen werden unterschiedliche Regulationsniveaus mit komplexeren und vielschichtigeren VVR-Einheiten benötigt. Vereinfacht können die Regulationsniveaus in aufsteigender Reihenfolge wie folgt bezeichnet werden (vgl. Hacker, 2009):

- automatisiert-sensomotorische Regulationsebene (nicht-bewusstseinspflichtig)
- perceptiv-begriffliche Regulationsebene (bewusstseinsfähig und wissensgestützt)
- intellektuelle Regulationsebene (bewusstseinspflichtige Analyse- und Synthesevorgänge)

Die höheren Regulationsebenen enthalten die Vorgänge der unteren Ebenen in verkürzter Form (Hacker, 2009). Die operativen Abbildsysteme mit dem enthaltenen Ergebnis- und Vorgehensmodell werden für die ausführungregulatorische Verwirklichung und Kontrolle der Tätigkeit genutzt und erfordern bei steigendem Regulationsniveau (Bewusstseinspflicht steigt an) mehrere Unterziele. Für die höchste intellektuelle Regulationsebene, die keine Zielantizipation oder keine Prädiktion von Maßnahmen ermöglicht (z. B. ein neues Produkt ohne Vorgaben entwickeln), kann sogar nur eine Zielannäherung erfolgen (Hacker & Sachse, 2014). Dabei werden aus bekanntem Wissen Möglichkeiten zur Zielpräzisierung gewählt und versuchsweise als Unterziel verwendet. Zu einer „effektivitätssteigernden und lernfördernden sowie alterns- und altersgerechten Arbeitsgestaltung“ (Hacker & Sachse, 2014, S. 173) müssen alle drei Regulationsniveaus genutzt werden. Die Tätigkeit wäre somit hierarchisch vollständig. Die hierarchische Vollständigkeit ist jedoch abhängig von der Qualität der Komponenten der psychischen Regulation von Tätigkeiten. Diese Komponenten beeinflussen den Aufbau der operativen Abbildsysteme und sind dadurch essenziell für die Verwirklichung von Tätigkeiten.

*Komponenten der psychischen Regulation.* Laut Tomaszewski (1978) können fünf Komponenten der psychischen Regulation unterschieden werden, welche nach Hacker (2009) sowie Hacker und Sachse (2014) auf folgende Weise zu verstehen sind:

- Richten: Redefinition eines Auftrags zur Aufgabe (siehe Kapitel 2) mit der Vor(weg)nahme des Ziels und dem Aufstellen eines Ergebnismodells (Antizipation des Ziels gemäß des operativen Abbildsystems);
- Orientieren: erforderliche Informationen, Kenntnisse und Erfahrungen über die Aufgabe, die Ausführungsmöglichkeiten sowie -bedingungen werden aufgenommen und verarbeitet (Repräsentation des Ausgangszustands und Abruf von Handlungswissen über Prädiktionen von Maßnahmen gemäß des operativen Abbildsystems);
- Entwerfen: entsprechend des Vergleichs von Ausgangs- und Sollzustand sowie unter Einbezug der Prädiktionen von Transformationsmaßnahmen werden Unterziele und Aktionsprogramme im Sinne eines Vorgehensmodells (Strategien, Handlungsschemata, Bewegungsentwürfe) aufgestellt (gemäß des operativen Abbildsystems werden konkrete Prädiktionen von Transformationsmaßnahmen entworfen);
- Entscheiden: Auswahl zwischen verschiedenen Ausführungsweisen treffen und einen Entschluss als Übergang von der Handlungsvorbereitung zum Handlungsvollzug ausführen;
- Kontrollieren: rückkoppelnde Vergleiche mit operativen Abbildsystem (reafferente Sonderform des Orientierens), schließt Regelkreis und erklärt zyklische Struktur.

Diese Komponenten bieten die Möglichkeit einer intraindividuellen psychischen Regulation. Das bedeutet, dass die Antizipationen, Prädiktionen und Repräsentationen dieses Regulationsprozesses von den Arbeitenden abhängig sind. Intraindividuell entstehen zum Beispiel Änderungen durch Berufserfahrung und Wiederholung. Dabei können Prozesse, die vorher noch auf einer bewussten Regulationsebene abgelaufen sind, zunehmend automatisiert werden. Auch interindividuelle Unterschiede in den Leistungsvoraussetzungen können zu verschiedenen Repräsentationen des Ausgangszustands, Prädiktionen von Maßnahmen und Antizipationen von Zielen sowie anders wahrgenommenen Regulationsniveaus führen. Bei objektiv gleichen Bedingungen können dadurch inter- und intraindividuell unterschiedliche Arbeitsergebnisse und Bearbeitungszeiten entstehen. Die Unterschiede werden bei zunehmender Komplexität, Kompliziertheit oder Neuartigkeit von Aufträgen größer. Ungeachtet dessen bleibt die regulative Struktur der Tätigkeit immer erhalten (Hacker & Sachse, 2014). Wenn beispielsweise eine vormals bewusste Handlung nun automatisiert abläuft, ändern sich die Handlungen, Operationen und Bewegungen nicht. Die Handlung wird jedoch zu implizitem Wissen, welches die Eigenschaft der Bewusstseinsfähigkeit beibehält, auch wenn der Arbeitende dies nicht mehr so wahrnimmt. Die auftragsabhängige psychische Struktur der Tätigkeit ist somit ein objektiver Sachverhalt und von der subjektiven, redefinitionsabhängigen Aufgabenverwirklichung des Arbeitenden zu unterscheiden (Hacker & Sachse, 2014). Abbildung 2 stellt die Zusammenhänge der Komponenten der psychischen

Regulation dar. In der Darstellung wird deutlich, dass Handlungsvorbereitung und -vollzug sowie Antriebs- und Ausführungsregulation keine getrennten Vorgänge sind, sondern verzahnt und gleichzeitig ablaufen (Hacker & Sachse, 2014). Wie bei den VVR-Einheiten beschrieben, handelt es sich um einen fortlaufenden Regelkreis, bei dem Vergleich, Vor(weg)nahme, Veränderung und Rückmeldung wiederholt ablaufen.

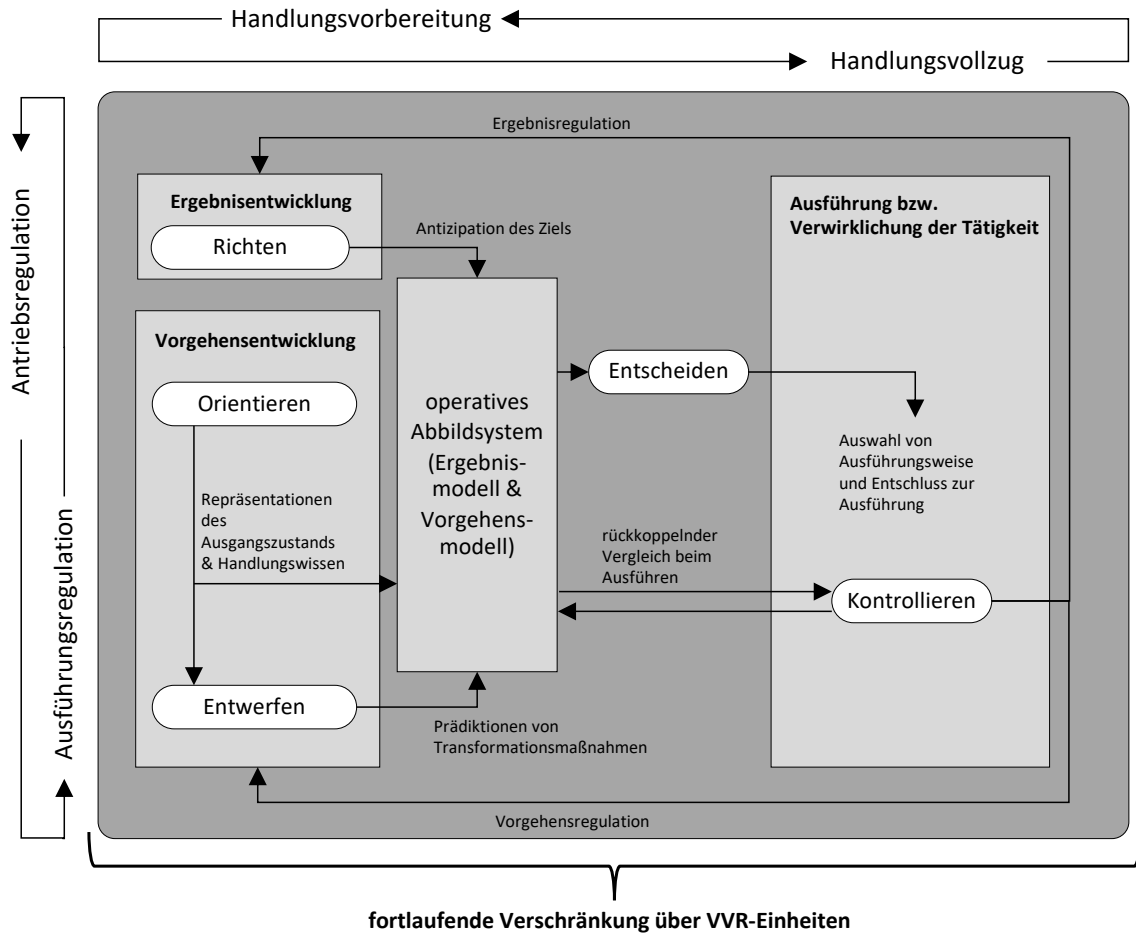

Abbildung 2. Komponenten der psychischen Regulation von Arbeitstätigkeiten (eigene Darstellung nach Hacker & Sachse, 2014)

*Sequenzielle Vollständigkeit.* Zur Bewertung und Gestaltung der fünf Komponenten der Regulation, und somit sachlogisch der Arbeitstätigkeit, hat sich das Konstrukt der vollständigen Tätigkeit als sehr praktisch erwiesen (Hacker & Sachse, 2014; Hacker & Schönfelder, 1985). Im engeren Sinne lässt sich die Vollständigkeit durch die sequentielle und hierarchische Vollständigkeit beschreiben (Hacker, 2009). Während die hierarchische Vollständigkeit die Regulationsebenen betrifft, kann die Arbeitstätigkeit als sequentiell vollständig bezeichnet werden, wenn sie folgende Tätigkeitsbestandteile aufweist (Hacker & Sachse, 2014; Hacker, Fritsche, Iwanowa & Richter, 1995):

- Vorbereiten: Vorbereiten der Arbeitstätigkeit (z.B. Planen der eigenen Tätigkeit oder Vorbereitung von Arbeitsmitteln und -gegenständen);
- Organisieren; Abstimmung mit vor-, nach- oder nebengelagerten Aufträgen von anderen (z.B. Planung oder Anleitung von Tätigkeiten anderer);
- Ausführen: weisungsgerechtes Bearbeiten des Auftrags (z.B. Bedienen einer Maschine);
- Kontrollieren: Möglichkeiten zum Kontrollieren und gegebenenfalls Korrigieren der eigenen Arbeitsergebnisse (z.B. Prüfen und Testen); Wichtig: Damit ist nicht das rückkoppelnde Kontrollieren der Phasen der psychischen Regulation nach Tomaszewski (1978) gemeint, sondern die Zwischen- bzw. Endkontrolle des im Auftrag formulierten Arbeitsergebnisses (Hacker et al., 1995).

Diese Tätigkeitsbestandteile lassen sich den fünf Phasen der psychischen Tätigkeitsregulation generell nicht zuordnen. Denn selbst wenn die Tätigkeit nur das Ausführen aufweist, läuft bei den Arbeitenden der komplette Regulationsvorgang mit den Phasen Richten, Orientieren, Entwerfen, Entscheiden und rückkoppelndes Kontrollieren ab. Durch die weiteren Tätigkeitsbestandteile Vorbereiten, Organisieren und Kontrollieren wird allerdings die Qualität des psychischen Regulationsvorgangs beeinflusst. Die Hinzunahme einer dieser Tätigkeitsbestandteile beeinflusst immer alle Phasen der psychischen Regulation. Die Erhöhung der sequenziellen Vollständigkeit hat somit auch die Zunahme der hierarchischen Vollständigkeit (Denkanforderungen) zur Folge, da mit steigender zyklischer Vollständigkeit „zunehmender inhaltlicher und zeitlicher Tätigkeitsspielraum mit seinen Zielstellungs- und Entscheidungsmöglichkeiten bzw. Entscheidungserfordernissen“ (Hacker & Sache, 2014, S.177) einhergeht. Hinzuzufügen ist, dass mit vollständigen Tätigkeiten im weiteren Sinne auch ausreichend aktivierende Anforderungen, die Möglichkeit zur Verantwortungsübernahme sowie Kooperations- und Lernmöglichkeiten einhergehen (Hacker, 2009). Ist die Tätigkeit unvollständig kann sie als partialisiert bezeichnet werden. Abbildung 3 stellt die partialisierte und vollständige Tätigkeit auf der Auftragsebene, der Merkmalsebene und Regulationsebene gegenüber. Die Ausprägungen sind hier als Extreme zu verstehen, welche die Endpunkte eines Kontinuums darstellen.

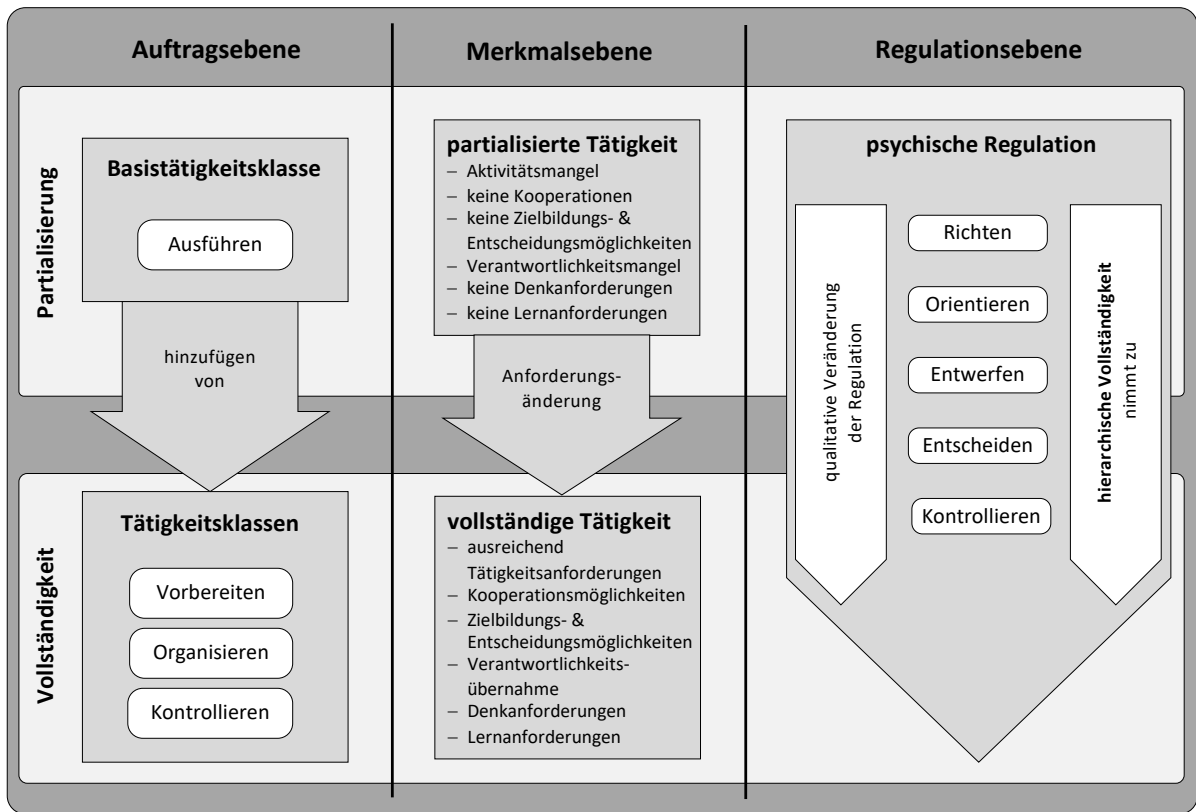

Abbildung 3. Gegenüberstellung von vollständiger und partialisierter Tätigkeit auf der Auftrags-, Merkmals & Regulationsebene
