# Supplementary material for: Das Konstrukt der „vollständigen Tätigkeit“ als Ziel guter Arbeitsgestaltung
Source: Atypon-hosted journal article supplement (doi:10.1026/0932-4089/a000420), 2023-10-12
Supplement: 0932-4089_a000420_esm2.pdf [file 0932-4089_a000420_esm2.pdf]

## ESM 2. Grafische Darstellung der parallelen Mediationen

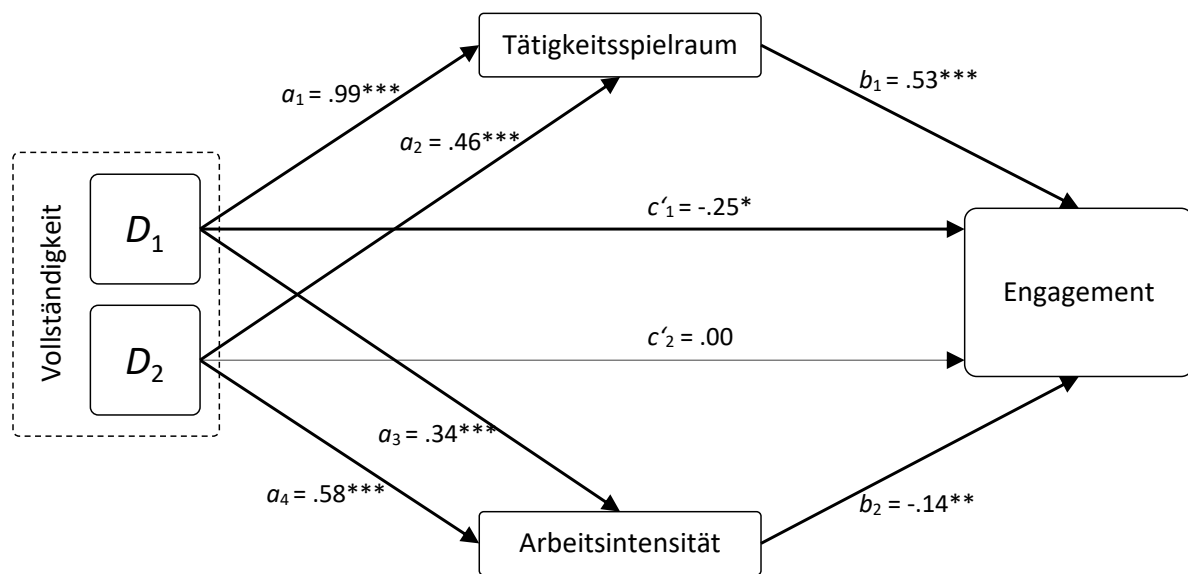

Abbildung 1. Parallele Mediation mit der abhängigen Variable Engagement (signifikante Pfade sind hervorgehoben)

$D_1$  = Dummy-Variable zur Operationalisierung der Veränderung von unvollständigen zu semi-vollständigen Tätigkeiten;  $D_2$  = Dummy-Variable zur Operationalisierung der Veränderung von semi-vollständigen zu vollständigen Tätigkeiten;  $a_{1/2/3/4}$  = Regressionskoeffizienten von Vollständigkeit zu den Mediatoren;  $b_{1/2}$  = Regressionskoeffizienten von den Mediatoren zur jeweiligen abhängigen Variable;  $c'_{1/2}$  = relativer direkter Effekt von Vollständigkeit zur jeweiligen abhängigen Variable; \*  $p < .05$ , \*\*  $p < .01$ , \*\*\*  $p < .001$ .

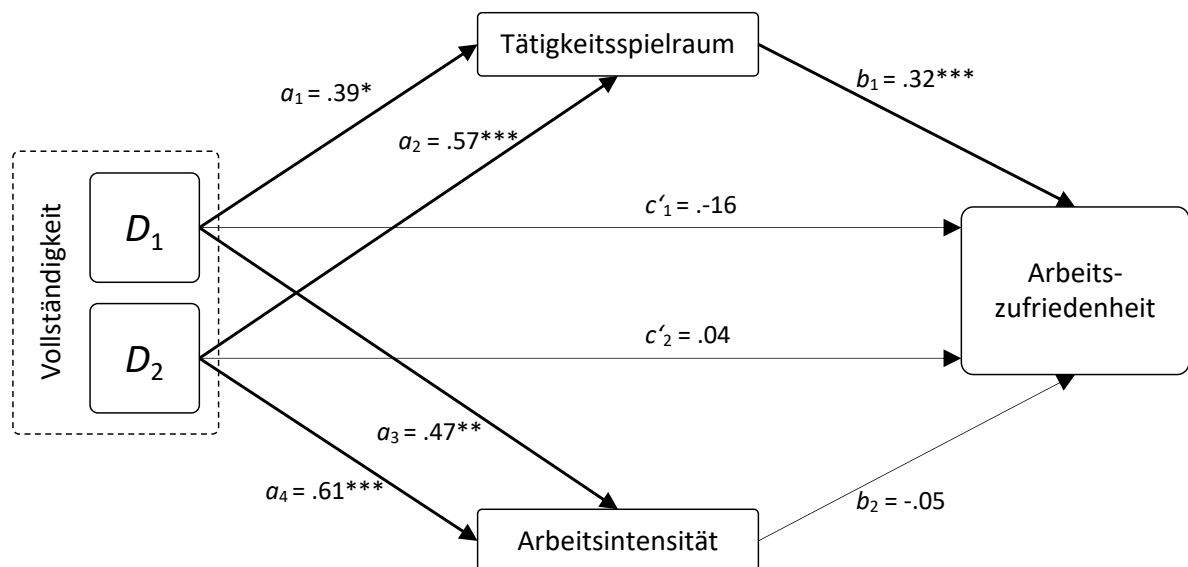

Abbildung 2. Parallele Mediation mit der abhängigen Variable Arbeitszufriedenheit (signifikante Pfade sind hervorgehoben)

$D_1$  = Dummy-Variable zur Operationalisierung der Veränderung von unvollständigen zu semi-vollständigen Tätigkeiten;  $D_2$  = Dummy-Variable zur Operationalisierung der Veränderung von semi-vollständigen zu vollständigen Tätigkeiten;  $a_{1/2/3/4}$  = Regressionskoeffizienten von Vollständigkeit zu den Mediatoren;  $b_{1/2}$  = Regressionskoeffizienten von den Mediatoren zur jeweiligen abhängigen Variable;  $c'_{1/2}$  = relativer direkter Effekt von Vollständigkeit zur jeweiligen abhängigen Variable; \*  $p < .05$ , \*\*  $p < .01$ , \*\*\*  $p < .001$ .

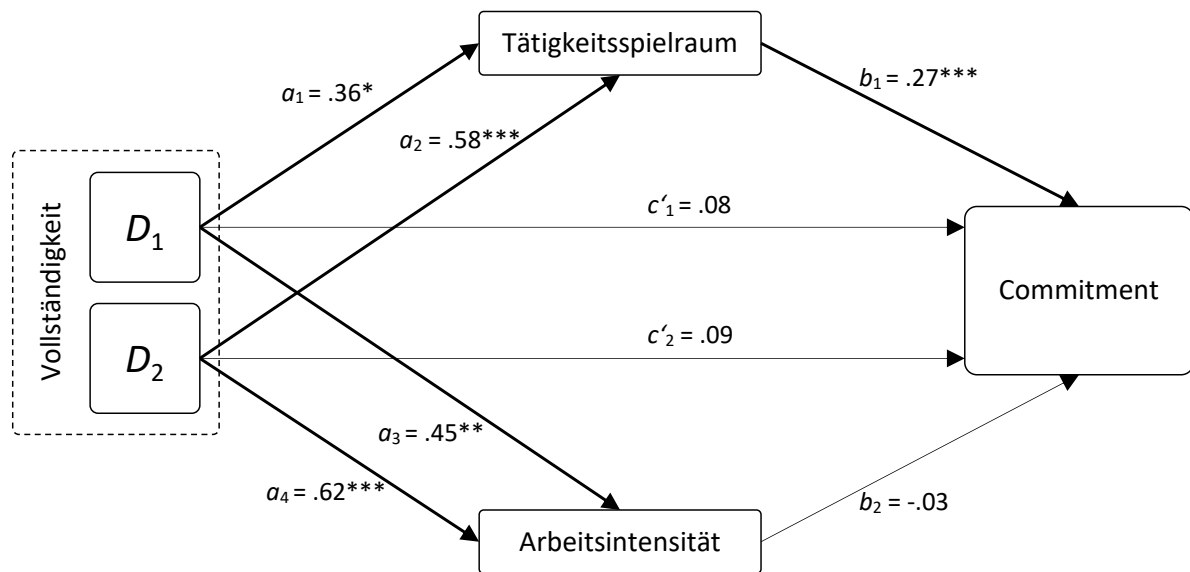

Abbildung 3. Parallele Mediation mit der abhängigen Variable Commitment (signifikante Pfade sind hervorgehoben)

$D_1$  = Dummy-Variable zur Operationalisierung der Veränderung von unvollständigen zu semi-vollständigen Tätigkeiten;  $D_2$  = Dummy-Variable zur Operationalisierung der Veränderung von semi-vollständigen zu vollständigen Tätigkeiten;  $a_{1/2/3/4}$  = Regressionskoeffizienten von Vollständigkeit zu den Mediatoren;  $b_{1/2}$  = Regressionskoeffizienten von den Mediatoren zur jeweiligen abhängigen Variable;  $c'_{1/2}$  = relativer direkter Effekt von Vollständigkeit zur jeweiligen abhängigen Variable; \*  $p < .05$ , \*\*  $p < .01$ , \*\*\*  $p < .001$ .

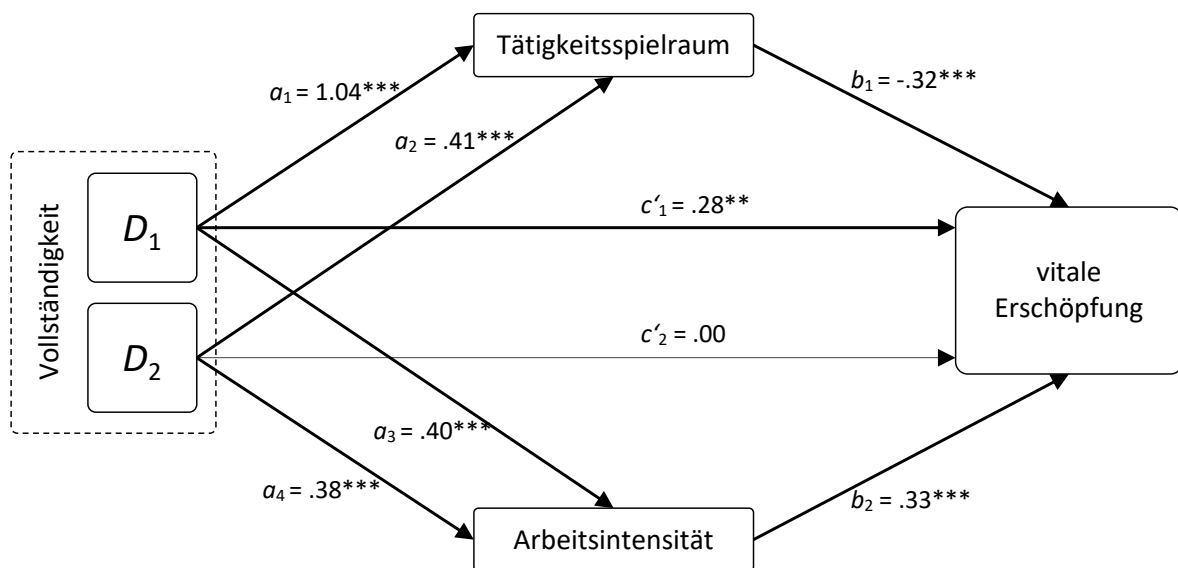

Abbildung 4. Parallele Mediation mit der abhängigen Variable vitale Erschöpfung (signifikante Pfade sind hervorgehoben)

$D_1$  = Dummy-Variable zur Operationalisierung der Veränderung von unvollständigen zu semi-vollständigen Tätigkeiten;  $D_2$  = Dummy-Variable zur Operationalisierung der Veränderung von semi-vollständigen zu vollständigen Tätigkeiten;  $a_{1/2/3/4}$  = Regressionskoeffizienten von Vollständigkeit zu den Mediatoren;  $b_{1/2}$  = Regressionskoeffizienten von den Mediatoren zur jeweiligen abhängigen Variable;  $c'_{1/2}$  = relativer direkter Effekt von Vollständigkeit zur jeweiligen abhängigen Variable; \*  $p < .05$ , \*\*  $p < .01$ , \*\*\*  $p < .001$ .

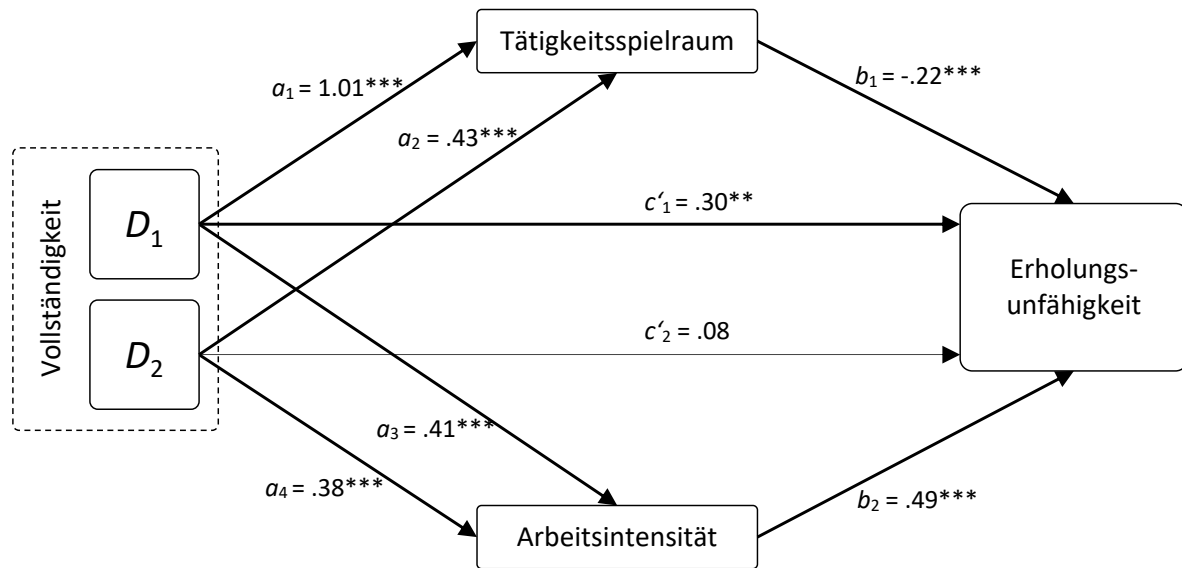

Abbildung 5. Parallele Mediation mit der abhängigen Variable Erholungsunfähigkeit (signifikante Pfade sind hervorgehoben)

$D_1$  = Dummy-Variable zur Operationalisierung der Veränderung von unvollständigen zu semi-vollständigen Tätigkeiten;  $D_2$  = Dummy-Variable zur Operationalisierung des Veränderung von semi-vollständigen zu vollständigen Tätigkeiten;  $a_{1/2/3/4}$  = Regressionskoeffizienten von Vollständigkeit zu den Mediatoren;  $b_{1/2}$  = Regressionskoeffizienten von den Mediatoren zur jeweiligen abhängigen Variable;  $c'_{1/2}$  = relativer direkter Effekt von Vollständigkeit zur jeweiligen abhängigen Variable; \*  $p < .05$  \*\*,  $p < .01$ , \*\*\*  $p < .001$ .
